# Supplementary material for: Host plant adaptation in the polyphagous whitefly, Trialeurodes vaporariorum, is associated with transcriptional plasticity and altered sensitivity to insecticides
Source: PubMed Central journal article supplement (PMC6923851; doi:10.1186/s12864-019-6397-3), 2019-12-19

# Additional File: Figure S2

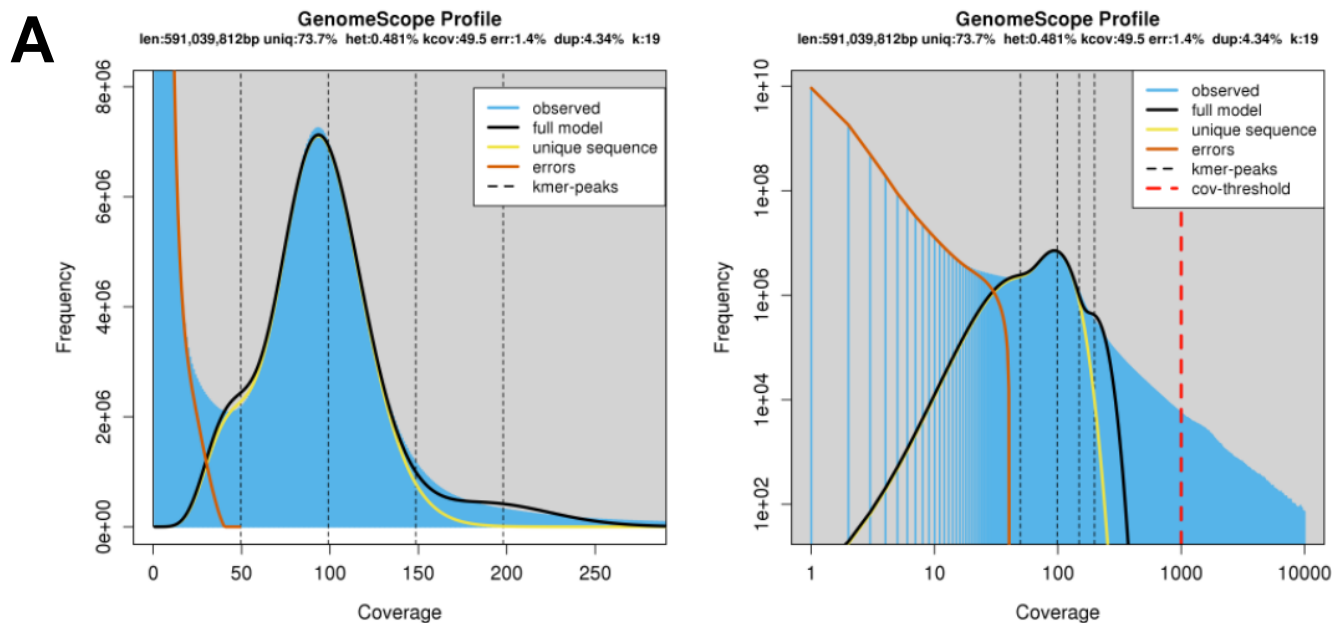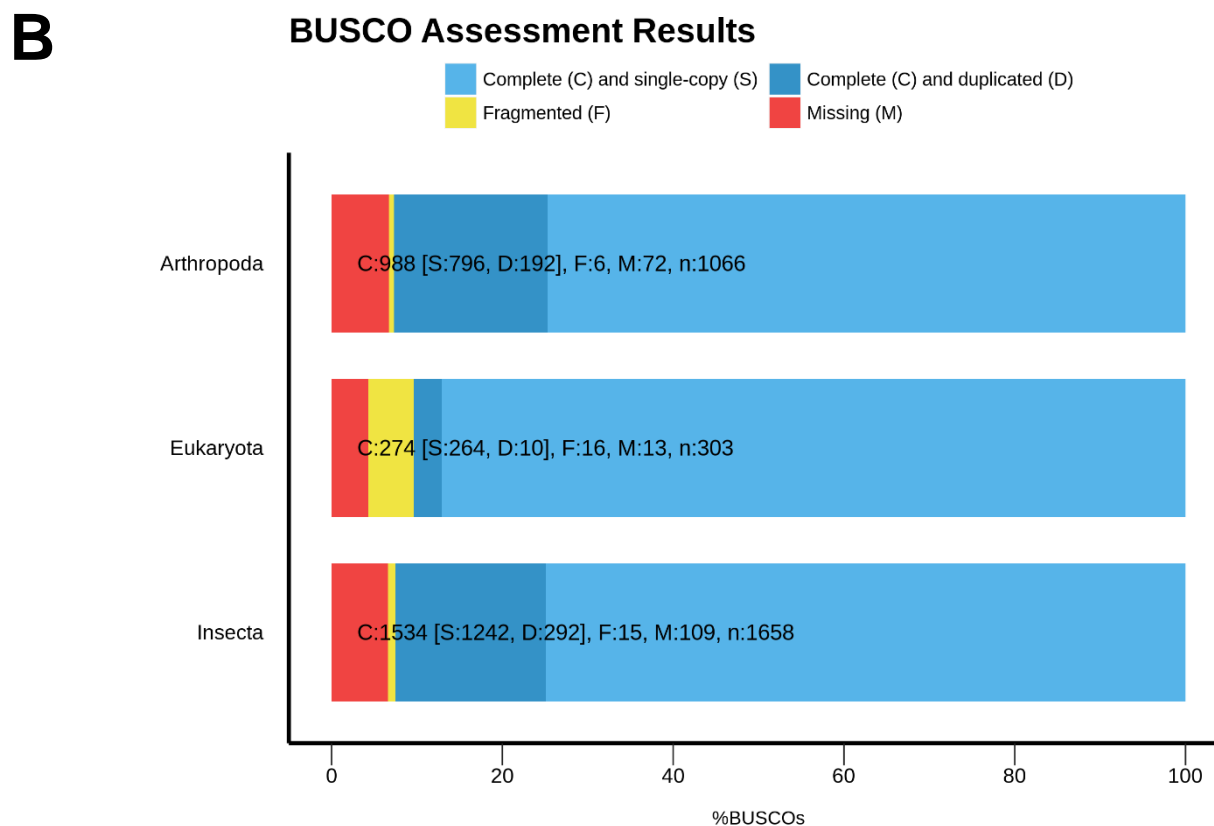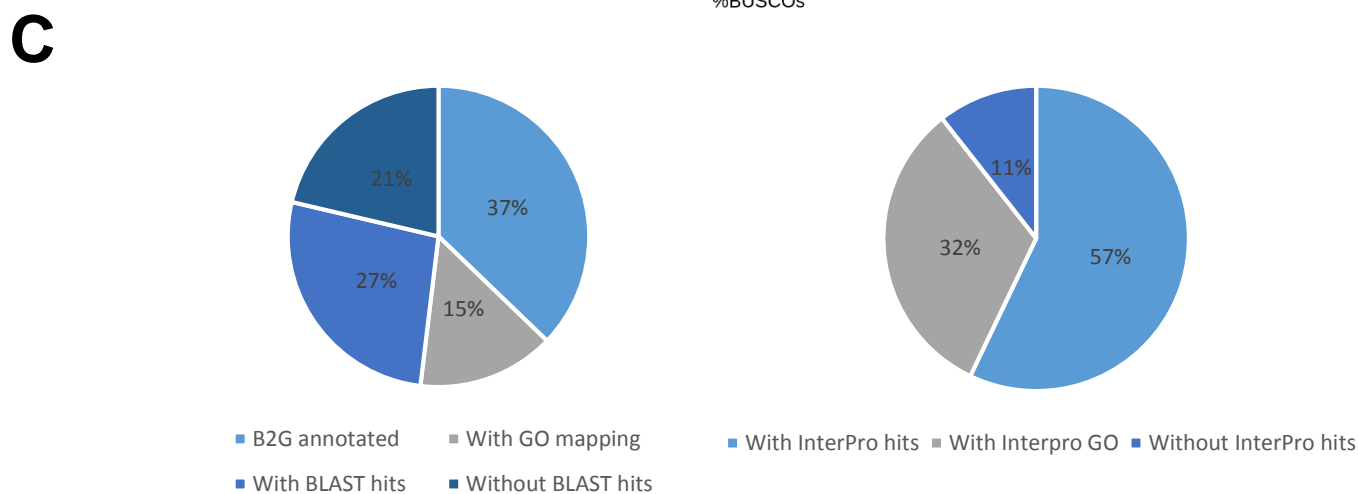

Supplement: 12864_2019_6397_MOESM4_ESM.pdf [file 12864_2019_6397_MOESM4_ESM.pdf]
