# Supplementary material for: Host plant adaptation in the polyphagous whitefly, Trialeurodes vaporariorum, is associated with transcriptional plasticity and altered sensitivity to insecticides
Source: PubMed Central journal article supplement (PMC6923851; doi:10.1186/s12864-019-6397-3), 2019-12-19
Supplement: 12864_2019_6397_MOESM13_ESM.pdf [file 12864_2019_6397_MOESM13_ESM.pdf]

# Additional File 13: Figure S3

**A**

**Delta**

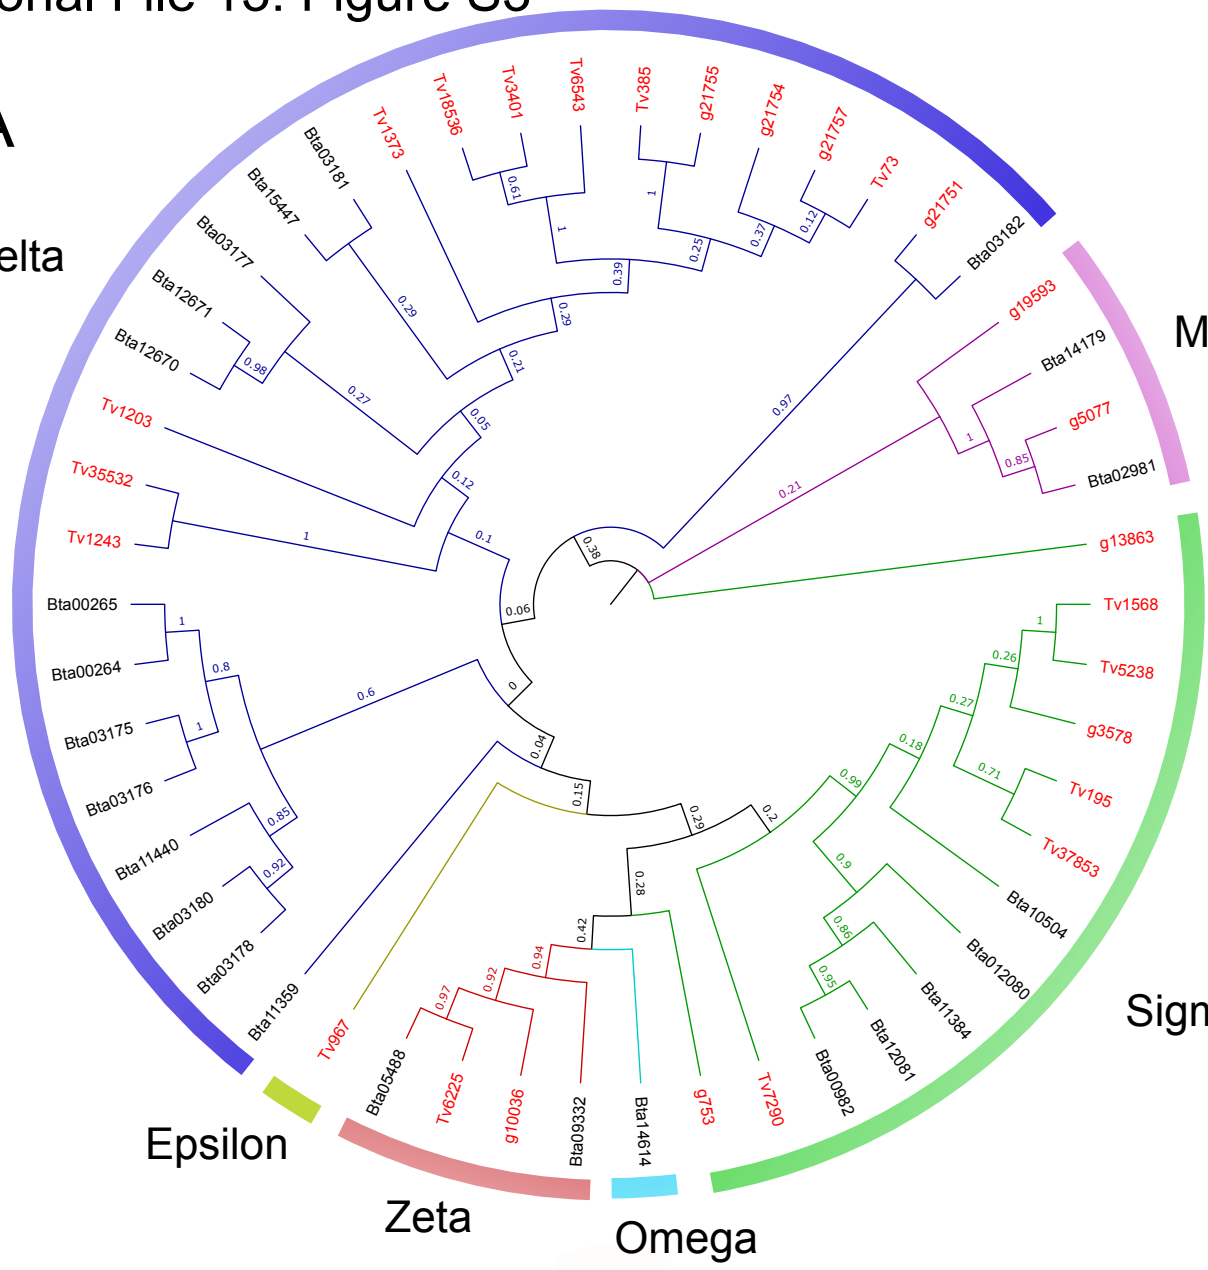

**Microsomal**

**Sigma**

**Epsilon**

**Zeta**

**Omega**

**B**

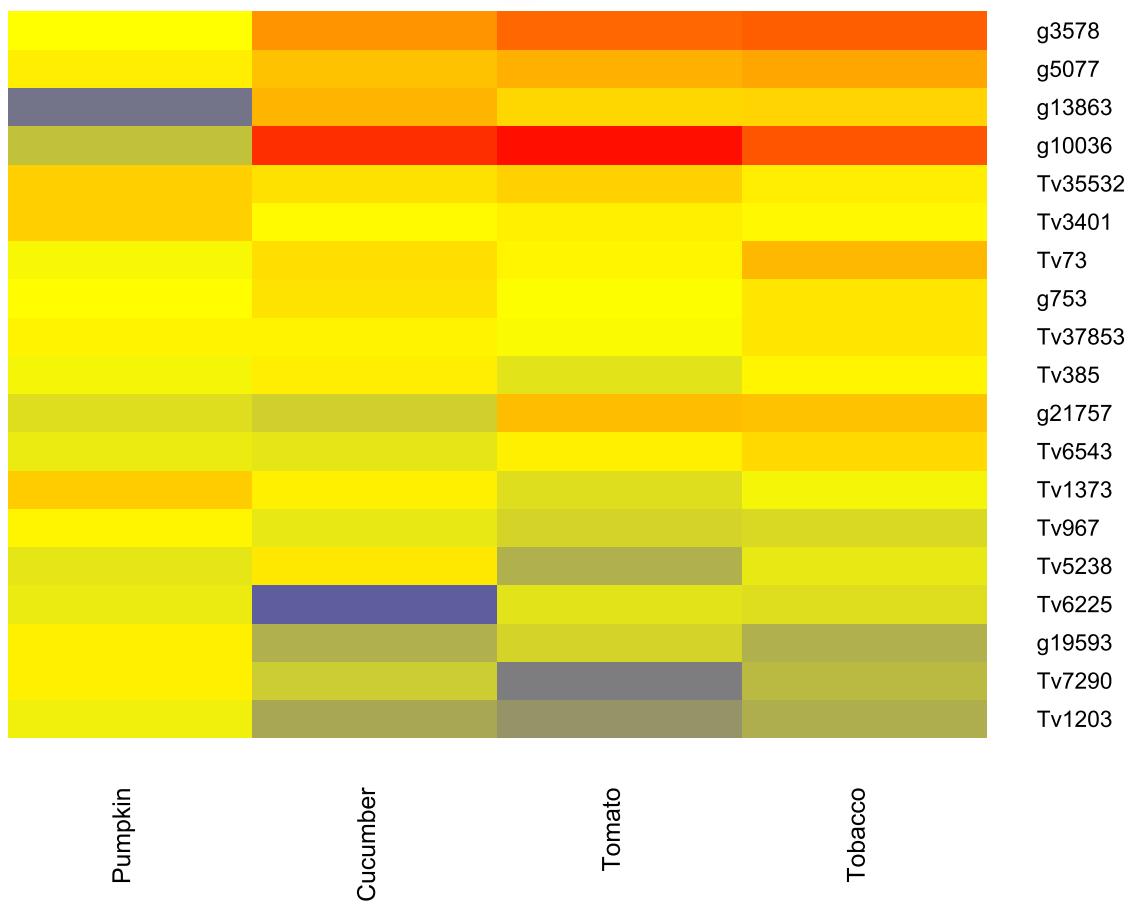

Pumpkin

Cucumber

Tomato

Tobacco
